# Supplementary material for: Fast folding dynamics of an α-helical peptide with bulky side chains
Source: Royal Society of Chemistry journal article supplement (doi:10.1039/b312348k), 2004-01-01
Supplement: b312348k.pdf [file b312348k.pdf]

**Sarah A. Petty and Martin Volk**  
**Fast Folding Dynamics of an  $\alpha$ -Helical Peptide with Bulky Side Chains**

**Material for Electronic Supplementary Information**

| Temperature / °C    | 0      | 10     | 20     | 30     | 40     | 50     | 60     | 70     | 80     |
|---------------------|--------|--------|--------|--------|--------|--------|--------|--------|--------|
| A (total)           | 38.6   | 39.7   | 37.9   | 38.3   | 37.8   | 37.7   | 37.5   | 37.5   | 37.5   |
| Band 1              |        |        |        |        |        |        |        |        |        |
| f                   | 0.484  |        |        |        |        |        |        |        |        |
| xc/cm <sup>-1</sup> | 1625.5 |        |        |        |        |        |        |        |        |
| w/cm <sup>-1</sup>  | 28.7   | 29.1   | 29.1   | 29.9   | 30.0   | 30.2   | 30.2   | 30.7   | 30.7   |
| v <sub>LG</sub>     | 0.75   | 0.98   | 0.83   | 0.92   | 0.93   | 0.96   | 0.97   | 0.97   | 0.97   |
| Band 2              |        |        |        |        |        |        |        |        |        |
| f                   | 0.115  | 0.092  | 0.084  | 0.064  | 0.051  | 0.034  | 0.019  | 0.005  | 0.005  |
| xc/cm <sup>-1</sup> | 1613.6 | 1614.0 | 1614.1 | 1614.5 | 1614.7 | 1614.8 | 1614.4 | 1614.1 | 1614.1 |
| w/cm <sup>-1</sup>  | 26.4   | 21.7   | 22.6   | 20.6   | 20.1   | 18.2   | 15.8   | 10.3   | 10.3   |
| v <sub>LG</sub>     | 1      | 1      | 1      | 1      | 1      | 1      | 1      | 1      | 1      |
| Band 3              |        |        |        |        |        |        |        |        |        |
| f                   | 0.375  | 0.404  | 0.406  | 0.437  | 0.452  | 0.471  | 0.483  | 0.496  | 0.496  |
| xc/cm <sup>-1</sup> | 1647.3 | 1646.5 | 1648.2 | 1648.2 | 1648.6 | 1648.7 | 1648.9 | 1649.1 | 1649.1 |
| w/cm <sup>-1</sup>  | 36.0   | 39.3   | 38.0   | 41.4   | 42.3   | 43.5   | 44.0   | 44.7   | 44.7   |
| v <sub>LG</sub>     | 0      | 0      | 0      | 0      | 0      | 0      | 0      | 0      | 0      |
| Band 4              |        |        |        |        |        |        |        |        |        |
| f                   | 0.025  | 0.019  | 0.025  | 0.014  | 0.012  | 0.011  | 0.013  | 0.014  | 0.014  |
| xc/cm <sup>-1</sup> | 1674.0 | 1674.0 | 1674.1 | 1674.2 | 1674.1 | 1673.9 | 1673.6 | 1672.9 | 1672.9 |
| w/cm <sup>-1</sup>  | 18.0   | 17.3   | 18.8   | 15.7   | 15.4   | 15.4   | 16.5   | 18.0   | 18.0   |
| v <sub>LG</sub>     | 0      | 0      | 0      | 0      | 0      | 0      | 0      | 0      | 0      |

**Table A** Parameters obtained from the fits of the temperature dependent FTIR spectra of PHPG in D<sub>2</sub>O to four “pseudo-Voigt” bands. A (total) is the total area of the amide I' band and f, xc, w and v<sub>LG</sub> are the fractional area, centre frequency, full width at half maximum and Lorentzian/Gaussian contributions of each component band (v<sub>LG</sub> = 0 represents a purely Gaussian band and v<sub>LG</sub> = 1 a purely Lorentzian band).
